# Supplementary material for: Characterisation of an epigenetically altered CD4+ CD28+ Kir+ T cell subset in autoimmune rheumatic diseases by multiparameter flow cytometry
Source: PubMed Central journal article supplement — Lupus Sci Med. 2016 Apr 4;3(1):e000147. doi: 10.1136/lupus-2016-000147 (PMC4823547; doi:10.1136/lupus-2016-000147), 2016-04-04
Supplement: lupus-2016-000147supp_tableS1.pdf [file lupus-2016-000147supp_tableS1.pdf]

**Table S1. Study Subjects**

| <b>Gender</b> | <b>Age</b> | <b>Race</b> | <b>Diagnosis</b>        | <b>Disease Activity</b> | <b>Medications</b>                                                           | <b>Autoantibodies</b>                               |
|---------------|------------|-------------|-------------------------|-------------------------|------------------------------------------------------------------------------|-----------------------------------------------------|
| Female        | 23         | W           | Healthy Control         | None                    | None                                                                         | Not Done                                            |
| Female        | 25         | W           | Healthy Control         | None                    | None                                                                         | Not Done                                            |
| Female        | 36         | W           | Healthy Control         | None                    | None                                                                         | Not Done                                            |
| Female        | 54         | W           | Healthy Control         | None                    | None                                                                         | Not Done                                            |
| Female        | 64         | W           | Healthy Control         | None                    | None                                                                         | Not Done                                            |
| Female        | 41         | W           | Inactive SLE (0-2)      | SLEDAI 0                | Plaquenil 400 mg qd, methotrexate 15mg PO weekly, folic acid 1mg qd          | anti-DNA, anti-β2 glycoprotein, anti-phospholipid A |
| Female        | 65         | W           | Inactive SLE (0-2)      | SLEDAI 0                | Plaquenil 400mg qd, prednisone 50 mg qd                                      | anti-DNA                                            |
| Female        | 31         | W           | Inactive SLE (0-2)      | SLEDAI 0                | prednisone 15mg qd, Plaquenil 400mg qd                                       | anti-DNA                                            |
| Female        | 52         | W           | Inactive SLE (0-2)      | SLEDAI 0                | Plaquenil 400mg qd, methylprednisolone 4mg qd                                | anti-DNA                                            |
| Female        | 66         | W           | Inactive SLE (0-2)      | SLEDAI 2                | prednisone 5-10mg qd                                                         | anti-dsDNA, anti-chromatin RF, anti-b2-GP1          |
| Female        | 43         | W           | Inactive SLE (0-2)      | SLEDAI 2                | prednisone 5mg qd                                                            | anti-dsDNA, SSa/Ro, RNP                             |
| Female        | 19         | W           | Mildly Active SLE (4-5) | SLEDAI 4                | prednisone 20mg qd, Plaquenil 400mg qd, quinacrine 50mg qd                   | anti-Sm, RNP, SSa, SSb, RNP, dsDNA, chromatin       |
| Female        | 27         | W           | Mildly Active SLE (4-5) | SLEDAI 4                | dapsone 100mg qd, Plaquenil 300mg qd, CellCept 2500mg qd, prednisone 10mg qd | anti-dsNA                                           |

|        |    |    |                         |          |                                                                                                           |                                                                               |
|--------|----|----|-------------------------|----------|-----------------------------------------------------------------------------------------------------------|-------------------------------------------------------------------------------|
| Female | 44 | W  | Mildly Active SLE (4-5) | SLEDAI 4 | Plaquenil 400mg qd, CellCept 1000mg qd, prednisone 10mg qd                                                | anti-dsDNA, anti-phospholipid                                                 |
| Female | 65 | AA | Mildly Active SLE (4-5) | SLEDAI 4 | prednisone 10mg qd                                                                                        | anti-dsDNA, anti-SSa/SSb, anti-phospholipid                                   |
| Female | 45 | W  | SLE                     | SLEDAI 4 | prednisone 5mg qd, quinacrine 25mg qd                                                                     | anti-dsDNA, phospholipid, RNP                                                 |
| Female | 31 | W  | Mildly Active SLE (4-5) | SLEDAI 4 | hydroxychloroquine 400mg qd                                                                               | anti-Sm, RNP, chromatin, dsDNA                                                |
| Female | 34 | AA | Mildly Active SLE (4-5) | SLEDAI 4 | hydroxychloroquine 200mg qd, CellCept 3000mg qd, prednisone 15mg qd                                       | Sm, RNP, chromatin, dsDNA                                                     |
| Female | 19 | W  | Active SLE ( $\geq 6$ ) | SLEDAI 6 | quinacrine 25mg qd, prednisone 10mg qd, methotrexate 17.5mg weekly, Plaquenil 400mg qd, folic acid 1mg qd | anti-dsDNA, anti-Sm, anti-RNP                                                 |
| Female | 47 | W  | Active SLE ( $\geq 6$ ) | SLEDAI 6 | hydroxychloroquine 300mg qd, prednisone 7.5mg qd                                                          | $\beta 2$ glycoprotein                                                        |
| Female | 35 | W  | Active SLE ( $\geq 6$ ) | SLEDAI 6 | hydroxychloroquine 400mg qd, CellCept 2000mg qd, prednisone 20mg qd                                       | anti-dsDNA                                                                    |
| Female | 51 | W  | Active SLE ( $\geq 6$ ) | SLEDAI 8 | prednisone 20mg qd, CellCept 1000mg qd                                                                    | anti-dsDNA, hypocomplementemia, anti-Sm, RNP, SSa, SSb, chromatin, centromere |
| Female | 40 | AA | Active SLE ( $\geq 6$ ) | SLEDAI 8 | prednisone 20mg qd, quinacrine 75mg qd                                                                    | anti-dsDNA                                                                    |
| Female | 38 | W  | Active SLE ( $\geq 6$ ) | SLEDAI 8 | azathioprine 100mg qd,                                                                                    | Anti-dsDNA, anti-Sm,                                                          |

|        |    |   |                             |     |                                                                                              |                      |
|--------|----|---|-----------------------------|-----|----------------------------------------------------------------------------------------------|----------------------|
|        |    |   |                             |     | prednisone 5mg qd,<br>sulfasalazine 3000mg<br>qd                                             | RNP, SSa             |
| Female | 52 | W | RA (Inactive)               | 0   | abatacept 750mg IV<br>monthly                                                                | Not Available        |
| Female | 41 | W | RA (Inactive)               | 0   | etanercept 50mg SQ<br>weekly                                                                 | RF, anti-CCP         |
| Male   | 68 | W | RA (Inactive)               | 0   | etanercept 50mg SQ<br>weekly                                                                 | anti-CCP             |
| Female | 69 | W | RA (Inactive)               | 0   | hydroxychloroquine<br>400mg qd, leflunomide<br>20mg qd, prednisone<br>7.5mg qd               | RF, anti-CCP         |
| Male   | 60 | W | RA (Inactive)               | 0   | methotrexate 25mg SQ<br>weekly, prednisone<br>10mg qd                                        | Not Available        |
| Male   | 34 | W | RA Active                   | 1+  | adalimumab 40mg<br>every other week,<br>hydroxychloroquine<br>400mg qd, prednisone<br>5mg qd | anti-CCP             |
| Female | 68 | W | RA Active                   | 3+  | leflunomide 20mg qd,<br>hydroxychloroquine<br>400mg qd, prednisone<br>7.5mg qd               | RF, anti-CCP         |
| Female | 47 | W | RA Active                   | 3+  | tofacitinib 10mg qd,<br>prednisone 10mg qd                                                   | RF, anti-CCP         |
| Female | 53 | W | RA Active                   | 3+  | etanercept 50mg<br>weekly, prednisone<br>13.5mg daily,<br>hydroxychloroquine<br>200mg qd     | RF, CCP              |
|        |    |   |                             |     |                                                                                              |                      |
| Female | 48 | W | Retroperitoneal<br>Fibrosis | low | prednisone 10mg qd                                                                           | Neg. IgG4, No Biopsy |

|        |    |         |                                              |         |                                         |                            |
|--------|----|---------|----------------------------------------------|---------|-----------------------------------------|----------------------------|
| Female | 60 | W       | Retroperitoneal Fibrosis, also RA/Hashimotos | low     | leflunomide 10mg qd, CellCept 1000mg qd | Neg. IgG4, No Biopsy       |
| Female | 58 | W       | Retroperitoneal Fibrosis                     | low     | prednisone 60mg qd                      | Not Done                   |
| Female | 46 | W       | Retroperitoneal Fibrosis                     | low     | (no immunosuppressants)                 | Neg. IgG4, OSH Biopsy      |
| Male   | 56 | W       | Retroperitoneal Fibrosis                     | low     | CellCept 3000mg qd                      | Neg. IgG4, Neg. Biopsy     |
| Male   | 57 | UNKNOWN | Retroperitoneal Fibrosis                     | low     | CellCept 3000mg qd                      | Neg. IgG4, No Biopsy       |
| Male   | 53 | W       | Retroperitoneal Fibrosis                     | high    | (no immunosuppressants)                 | Not Done                   |
| Male   | 34 | AA      | Retroperitoneal Fibrosis                     | high    | CellCept 2000mg qd                      | Pos. IgG4, Positive Biopsy |
|        |    |         |                                              |         |                                         |                            |
| Female | 64 | AA      | Systemic Sclerosis (Sine)                    | MRSS 0  | (no immunosuppressants)                 | ANA, anti-Scl-70           |
| Female | 84 | W       | Systemic Sclerosis (Sine)                    | MRSS 0  | (no immunosuppressants)                 | ANA, anti-centromere       |
| Female | 47 | W       | Systemic Sclerosis (Limited)                 | MRSS 2  | (no immunosuppressants)                 | ANA                        |
| Male   | 38 | W       | Systemic Sclerosis (Diffuse)                 | MRSS 2  | (no immunosuppressants)                 | Not Available              |
| Female | 49 | W       | Systemic Sclerosis (Diffuse)                 | MRSS 9  | prednisone 15mg qd                      | anti-Scl-70, RF            |
| Male   | 64 | W       | Systemic Sclerosis (Diffuse)                 | MRSS 15 | CellCept 3000mg qd                      | Not Available              |
| Female | 47 | W       | Systemic Sclerosis (Diffuse)                 | MRSS 15 | methotrexate 20mg weekly, folate 1mg qd | ANA                        |
| Female | 46 | W       | Systemic Sclerosis (Diffuse)                 | MRSS 17 | methotrexate 20mg weekly, folate 1mg qd | Not Available              |

|        |    |    |                              |          |                                                                                        |                              |
|--------|----|----|------------------------------|----------|----------------------------------------------------------------------------------------|------------------------------|
| Male   | 32 | A  | Systemic Sclerosis (Diffuse) | MRSS 21  | prednisone 5mg qd, CellCept 2000mg qd                                                  | ANA, anti-SCL70              |
| Female | 45 | W  | Systemic Sclerosis (Diffuse) | MRSS 22  | (no immunosuppressants, is on folate 1mg qd, was on CellCept 2000mg qd 1-2 months ago) | ANA                          |
| Female | 45 | AA | Systemic Sclerosis (Diffuse) | MRSS 22  | hydroxychloroquine 400mg qd, CellCept 1000mg qd, prednisone 5mg qd                     | ANA, anti-SSa, anti-SSb      |
| Female | 61 | W  | Systemic Sclerosis (Diffuse) | MRSS 26  | CellCept 1000mg qd, prednisone 5mg qd                                                  | Negative                     |
| Female | 62 | W  | Sjogrens                     | ESSDAI 0 | (no immunosuppressants)                                                                | ANA, anti-La                 |
| Female | 77 | W  | Sjogrens                     | ESSDAI 0 | hydroxychloroquine 300mg qd                                                            | anti-Ro, anti-La, anti-dsDNA |
| Female | 80 | W  | Sjogrens                     | ESSDAI 0 | (no immunosuppressants)                                                                | RF, ANA, anti-Ro, anti-La    |
| Female | 48 | W  | Sjogrens                     | ESSDAI 0 | Plaquenil 200mg per day                                                                | RF, ANA, anti-Ro, anti-La    |
| Female | 48 | W  | Sjogrens                     | ESSDAI 1 | hydroxychloroquine 400mg qd                                                            | anti-La                      |
| Female | 67 | W  | Sjogrens                     | ESSDAI 1 | hydroxychloroquine 400mg qd                                                            | anti-dsDNA, anti-histone     |

A, Asian; AA, African American; W, White
